# Supplementary material for: Potential Cross Talk between Autism Risk Genes and Neurovascular Molecules: A Pilot Study on Impact of Blood Brain Barrier Integrity
Source: MDPI journal article supplement (doi:10.3390/cells11142211), 2022-07-15
Supplement: s1 [file s1]

## Methods:

### *IRB Approvals*

All studies and access to databases were reviewed and approved by the NIMH and human subject studies institutional review boards of the University of Louisville and Vanderbilt University Medical Center.

### *Protein-Protein Interactions*

The genes derived from the enrichment analysis using WebGestalt were further evaluated for their protein-protein interactions using STRING (Szklarczyk et al., 2015). A confidence level of 0.90 was used to formulate the interactions. STRING combines the probability of associations between proteins, both direct and indirect, from evidence collected across various arenas of databases. The association is calculated based on evidence from experimental data, mining of literature and databases, and genome context analysis (Szklarczyk et al., 2015). These associations are then corrected for the probability of a random observation of an interaction.

### *Mapping Brain Gene Expression to RDoC Neural Circuits*

By integrating the data of these genetic data, the maximum mRNA expression of the gene during pregnancy and post-pregnancy and the brain regions during that period was identified. After obtaining the maximum mRNA expression of the gene (time, brain region), the brain regions associated with each neural circuit were mapped through NIMH's RDoC-matrix (<https://www.nimh.nih.gov/research/research-funded-by-nimh/rdoc/constructs/rdoc-matrix.shtml>). Through the database, the corresponding circuits were matched to the brain regions with the maximum mRNA gene expression.

The RDoC neural circuits was divided into 1) Negative Valence Systems (including fear, anxiety, sustained threat, loss, frustrative non-reward), 2) Positive Valence Systems (Reward responsiveness, reward learning, reward valuation), 3) Cognitive Systems (Attention, perception, Declarative memory, Language, Cognitive Control, working memory), 4) Social Processes (Social communication, perception and understanding of self, in the loop of RDoC. Perception and understanding of others), Arousal and regulatory systems (arousal, circadian rhythms, sleep-wakefulness), and 5) Sensorimotor systems (Motor actions, agency and ownership, Habit-sensorimotor, Innate Motor patterns). According to these circuits and gene variant as the guide, we map the neural circuits to each subject with a given gene variant in the associated brain regions.

For a given question answered by parents, the scores of those ASD subjects with specific genetic variation in a given neural circuit was compared with ASD subjects with no genetic variation (i.e.- those ASD subjects with normal microarray: average age 11.2 years) in different behavior scales. ASD subjects with specific genetic variation were grouped together within the genetic variation group (Group 1) by 1) specific same gene variation and 2) maximal mRNA expression in a given brain region contained in the RDoC neural circuits. For each PCQ question or Vineland Scales subscore, all RDoC neural circuits in those with genetic variants were compared to scores of those ASD subjects with normal microarrays (Group 2).

### *Statistical analysis for Neural Circuit Comparisons:*

All data were performed using SPSS software11 (IBM SPSS Statistics for Windows, Version 24.0. Armonk, NY: IBM Corp) and plots were generated using GraphPad Prism version 8 (GraphPad software, San Diego, CA, USA). Equality of variances was tested by Levene's Test. Within group comparison was performed for behavioral scores by t-test for equality of variances. In case of inequality of variances, other data were analyzed using two-way ANOVA followed by Tukey post-hoc test. Two tailed Pearson analysis was used to find the correlation between variables. Data were presented as mean  $\pm$  SEM. The null hypothesis was rejected with  $p < 0.05$  as the level of significance.

### *Mouse Experiments*

The animal experiments were performed under protocols approved by the Vanderbilt University and the University of Louisville Institutional Animal Care and Use Committee.

**Mouse lines:** Semaphorin 3F knockout mice (CRE+FF) [DLX5/6<sup>Cre</sup>, deletion in GABAergic Neurons] and control mice (Cre-FF, Cre+WT, Cre-WT) lacking either Cre expression or Flox sites flanking the Sema 3F gene, or both, therefore expressing normal levels of Semaphorin 3F, were described in our previous publication (Li et al., 2019), and were used in the current study. 3-5 animals (3 to 6 months old) per group were used for immunofluorescence and immunohistochemical analysis. Animals were anesthetized and perfused transcardially with 4% paraformaldehyde, embedded and

cut into 30- $\mu$ m thick sections, then mounted onto charged slides. Brain of DLX5/6<sup>Cre</sup> knockouts and of EMX 1<sup>Cre</sup> heterozygotes [deletion in excitatory neurons] sacrificed at weaning, were weighed and compared to their respective controls.

**Immunofluorescence:** Sections were blocked with normal donkey or goat serum for 1 hour and incubated overnight at 4°C with primary antibodies such as iNOS (Abcam : Rabbit ,1:50), 3-NT (Millipore: Rabbit, 1:500), Serotonin (Abcam: Goat, 1:500), Albumin (Bethyl: Goat Polyclonal, 1:500), Fibrinogen (Agilent: Polyclonal Rabbit, 1:200), CD31 (Abcam: Rat, 1:100), p-selectin (Santa Cruz:Mouse 1:50), or with Biotin-conjugate isolectin B4 (IB4 Sigma: 1:200). The sections were incubated with appropriate FITC/TRITC-tagged anti-rabbit/ anti-mouse/ anti-rat or anti- goat secondary antibodies (Jackson ImmunoResearch, West Grove, PA) or with extravidin-FITC (Sigma) for IB4 staining, for 1 hour at room temperature in the dark. The stained sections were then mounted, and the images were captured using a laser scanning confocal microscope (Leica-TCS SL, Wetzlar, Germany) and staining intensity per tissue unit area ( $\mu$ m<sup>2</sup>) as well as co-localization in high magnification images, were quantified and averaged in 3 ROIs per slide in 3 slices per animal, using image analysis software (Image-Pro Plus). Data were expressed as intensity per unit area  $\pm$  SD.

**Immunohistochemistry:** 30- $\mu$ m thick sections obtained from cryostat sectioning were blocked with normal donkey serum for 1 hour. Primary antibodies were applied overnight at 4°C Iba1 (Wako Pure Chemical Industries: Rabbit, 1:450), CD61 (Invitrogen: Hamster Anti Mouse,1:200), IB4 (Sigma: Lectin,1:200). The sections were then incubated with appropriate biotinylated secondary antibodies (1:200, Vector Laboratories), followed by avidin/biotinylated enzyme complex treatment (Vectastain Elite ABC Kit, Vector Laboratories), and counterstained with hematoxylin (Vector Laboratories). Proteins were detected on color development using 3,3'-diaminobenzidine as substrate or VIP (Vector Laboratories). The images were captured using a Nikon microscope.

**Statistical analysis:** GraphPad Prism 6 software (GraphPad Software, San Diego, CA, USA) was used for the statistical analyses. Repeated measures two-way ANOVAs, followed by post-hoc Tukey's Multiple Comparison Test, were used to compare CRE-FF Sema 3F-KO mice with Cre-FF, Cre+WT, and Cre-WT mice, expressing normal levels of Semaphorin 3F. Data are presented as mean  $\pm$  SD. Differences between means were considered as significant at  $p \leq 0.05$ .

**Table S1.** List of patients CNVs.

| Patient ID | Chromosomal location | Genes | Type of mutation | Autism/ Epilepsy | Chromo. Physical Location |
|------------|----------------------|-------|------------------|------------------|---------------------------|
| V-4009     | 1p33                 |       | copy loss        | both             | 49993471-50241585         |
| V-5004     | 1p31.1               |       | copy loss        | both             | 83134636-83204648         |
| V-7088     | 1q42.3               |       | copy gain        | autism           | 235242449-235566242       |
| L-AA-06    | 1q44                 |       | copy gain        | autism           | 248752350-248788599       |
| L-AE-06    | 1q44                 |       | copy loss        | both             | 246818971-246855500       |
| V-4005     | 2p23.3               |       | copy loss        | both             | 26310934-26320554         |
| V-6002     | 2p16.1               |       | copy loss        | both             | 57972987-58321855         |
| L-AE-02    | 2p15                 |       | copy gain        | both             | 61339194-61837347         |
| V-7001     | 2q23.3               |       | copy loss        | autism           | 152518150-152621528       |
| V-4003     | 2q34                 |       | copy loss        | both             | 45468474-51263952         |
| V-4007     | 2q35                 |       | copy loss        | both             | 21559996-21569576         |
| L-AE-15    | 3p14.1               |       | duplication      | both             | 65925174-66369539         |
| V-7079     | 3p14.1               |       | copy loss        | autism           | 67662230-69109358         |
| L-AA-06    | 3q26.1               |       | copy gain        | autism           | 162545622-162619142       |
| V-085      | 3q29                 |       | copy loss        | both             | 197118426-198878855       |
| V-7073     | 4p16.3-16.2          |       | copy gain        | autism           | 2879238-3143876           |
| V-035      | 4p14                 |       | copy loss        | both             | 40293500-40350912         |
| V-7080     | 4p12                 |       | copy loss        | autism           | 52912914-52949184         |
| V-057      | 4q22.3               |       | copy gain        | both             | 95971459-96192102         |
| V-7028     | 4q31.23              |       | copy loss        | autism           | 149335718-149513891       |
| V-7027     | 5q35.1               |       | copy loss        | autism           | 169270815-169793639       |
| L-AE-02    | 6p25.3               |       | copy gain        | both             | 211046-321106             |
| L-AA-06    | 6p25.3               |       | copy gain        | autism           | 303239-375950             |
| V-6001     | 6p12.3               |       | copy gain        | both             | RP113427 to RP1166H4      |
| V-7036     | 6q15                 |       | copy loss        | autism           | 88843447-88942270         |
| V-7071     | 6q23.1-23.2          |       | copy loss        | autism           | 131232705-131361909       |
| V-7038     | 7p22.2               |       | copy loss        | autism           | 46757237-51207712         |
| V-7052     | 7q21.3               |       | copy loss        | autism           | 93449581-94035079         |
| L-AE-02    | 7q22.2               |       | copy loss        | both             | 105690859-105845281       |
| L-AE-02    | 7q31.33              |       | copy loss        | both             | 125406941-125530771       |
| V-7034     | 7q31.33              |       | copy loss        | autism           | 126232239-126329405       |
| L-AE-06    | 8p23.3-23.2          |       | duplication      | both             | 1703070-2285210           |
| L-AA-03    | 8p23.1               |       | duplication      | autism           | 10105550-10586767         |
| L-AE-33    | 8p22                 |       | copy gain        | both             | 16965962-17073395         |
| V-7081     | 8p12-11.1            |       | copy gain        | autism           | 32406314-46938968         |
| L-AA-06    | 8p11.22              |       | copy loss        | autism           | 36372150-36435256         |
| L-AE-33    | 8p11.21              |       | copy gain        | both             | 39395980-39490567         |
| L-AA-06    | 8p11.21              |       | copy gain        | autism           | 39246720-39371396         |
| L-AE-02    | 8p11.21              |       | copy loss        | both             | 39365946-39490567         |
| L-AE-06    | 8p11.21              |       | copy loss        | both             | 39365946-39490567         |
| V-006      | 9p21.2-21.3          |       | copy gain        | both             | 25108496-25703810         |
| V-5002     | 9q21.13-21.32        |       | copy loss        | both             | 67915482-77932017         |
| V-086      | 10p14                |       | copy gain        | both             | 10775715-11877958         |
| V-7049     | 10p13                |       | copy loss        | autism           | 15018761-15125968         |
| V-4002     | 10p11.23             |       | copy gain        | both             | 29526175-29874022         |
| L-AE-33    | 10q11.1              |       | copy loss        | both             | 46400346-46568287         |
| V-5006     | 10q11.22-11.23       |       | copy loss        | both             | 45468474-51263952         |
| V-6003     | 10q11.22-11.23       |       | copy gain        | both             | 45468474-51671987         |
| V-7053     | 10q11.23             |       | copy loss        | autism           | 52939210-53085688         |

|         |                |             |        |                     |
|---------|----------------|-------------|--------|---------------------|
| V-064   | 10q26.3        | copy gain   | both   | 133200689-133769778 |
| V-7050  | 13q31.3        | copy loss   | autism | 93249840-93301534   |
| V-7087  | 14q32.13       | copy gain   | autism | 94496673-94836029   |
| V-087   | 15q11.1-13.1   | copy gain   | both   | 20191652-28525505   |
| V-073   | 15q11.2        | copy loss   | both   | 25068625-25091478   |
| V-7068  | 15q11.2        | copy loss   | autism | 20014155-20851577   |
| V-5005  | 15q11.2-13.1   | copy gain   | both   | 20642827-27938509   |
| V-7074  | 15q13.3        | copy loss   | autism | 28456615-30247879   |
| V-7081  | 15q13.3        | copy loss   | autism | 31730445-32438736   |
| L-AE-14 | 15q13.3-14     | copy loss   | both   | 31291942-39213754   |
| V-7038  | 15q21.1-21.2   | copy loss   | autism | 46757237-51207712   |
| V-6005  | 16p24.3        | copy gain   | both   | 89967950-90085882   |
| V-4006  | 16p13.11       | copy loss   | both   | 14669916-16831960   |
| V-021   | 16p13.11       | copy gain   | both   | 16200143-16292148   |
| V-7015  | 16p13.2        | copy loss   | autism | 6764193-7072088     |
| V-064   | 16p12.2        | copy loss   | both   | 21328596-21976691   |
| V-063   | 16p11.13       | copy loss   | both   | 14669916-16831960   |
| V-7009  | 16p11.2        | copy gain   | autism | 28949609-30271188   |
| V-7048  | 16p11.2        | copy loss   | autism | 28473346-28949550   |
| V-7082  | 16p11.2        | copy loss   | autism | 28012439-30290867   |
| V-7096  | 16p11.2        | copy gain   | autism | 28199143-29678569   |
| L-AE-28 | 17p12          | copy loss   | both   | 14014324-15492482   |
| L-AE-02 | 17p11.2        | duplication | both   | 16755641-20147193   |
| V-7097  | 18p11.31-11.23 | copy gain   | autism | 7050712-7859424     |
| V-4001  | 18q22.1        | copy gain   | both   | 63799497-64741418   |
| V-7032  | 19p13.3        | copy gain   | autism | 781639-810851       |
| V-7064  | 19q12          | copy gain   | autism | 19857596-20596412   |
| V-5003  | 19q13.32-13.33 | copy gain   | both   | 53085957-55852469   |
| V-7098  | 21q22.11-22.12 | copy gain   | autism | 34657967-34832077   |
| V-080   | 21q23.3        | copy gain   | both   | 43904642-44267159   |
| V-032   | 22q11.21       | copy gain   | both   | 18919048-21939923   |
| V-7080  | 22q13.1        | copy loss   | autism | 38092709-38106149   |
| V-7062  | 22q13.31-13.33 | copy loss   | autism | 45145508-49691432   |
| L-AA-07 | Xp22.33-q28    | triple X    | autism | 216519-154881514    |
| L-AE-02 | Xp22.33        | copy loss   | both   | 3761569-3863478     |
| L-AA-06 | Xp22.32        | copy gain   | autism | 8598757-8701466     |
| V-092   | Xp22.31        | copy gain   | both   | 6279319-8199482     |
| V-4001  | Xp22.31        | copy gain   | both   | 6289319-7764729     |
| V-7080  | Xp22.2         | copy loss   | autism | 16775568-16804240   |
| V-7007  | Xp21.1         | copy loss   | autism | 32818043-33628679   |
| V-021   | Xp12           | copy gain   | autism | 65718497-65953240   |
